# Supplementary material for: Development and psychometric validation of a scoring questionnaire to assess healthy lifestyles among adolescents in Catalonia
Source: PubMed Central journal article supplement (PMC4731967; doi:10.1186/s12889-016-2778-6), 2016-01-28
Supplement: 12889_2016_2778_MOESM2_ESM.pdf [file 12889_2016_2778_MOESM2_ESM.pdf]

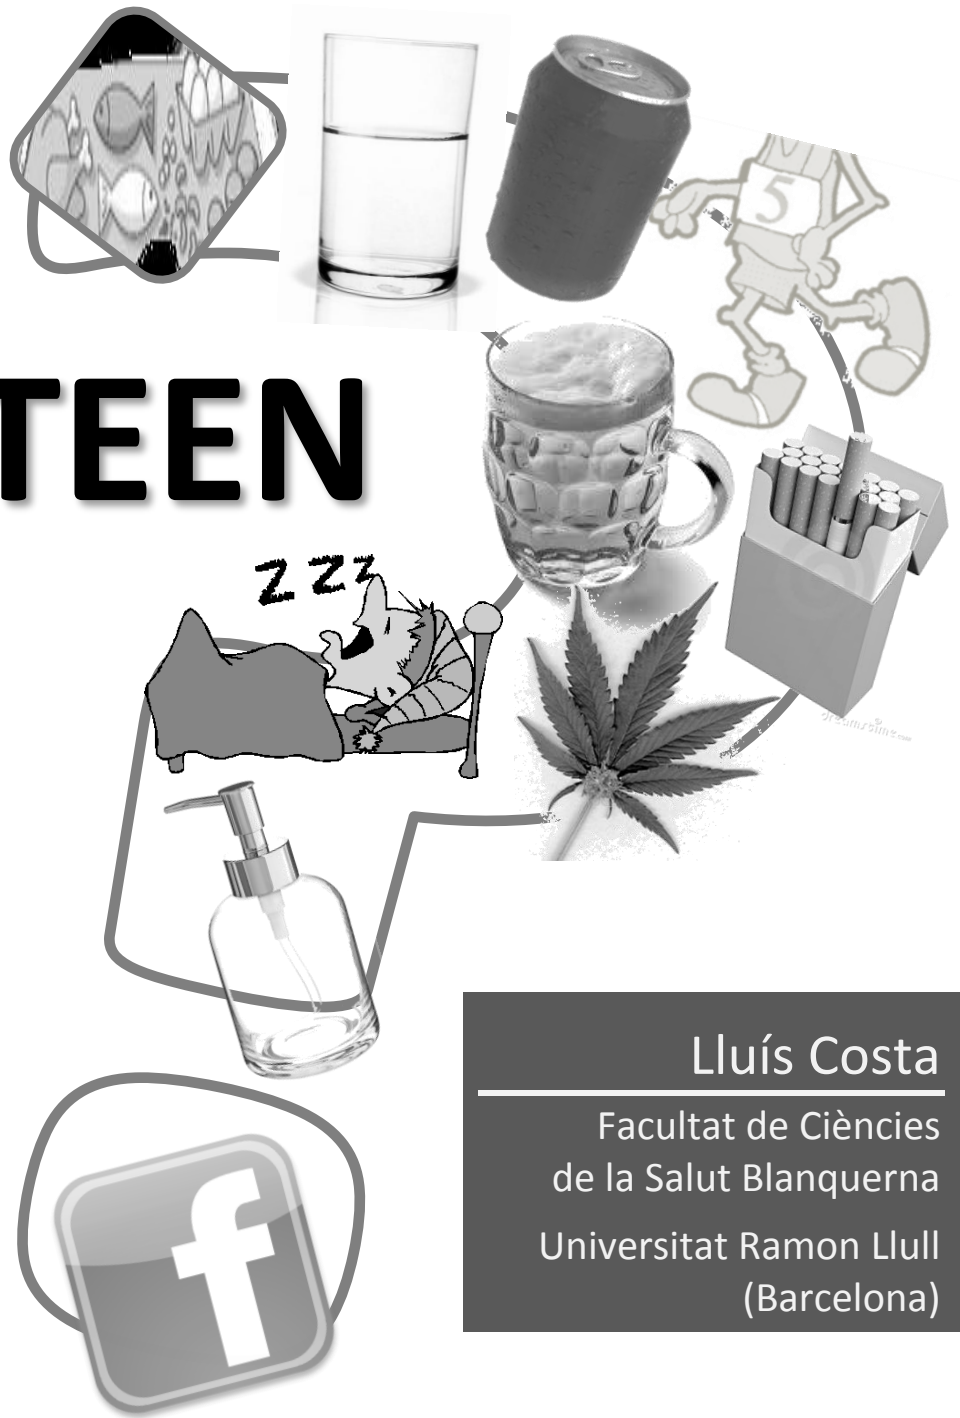

# VISA-TEEN

Lluís Costa

Facultat de Ciències  
de la Salut Blanquerna  
Universitat Ramon Llull  
(Barcelona)

**Cuestionario de estilo  
de Vida SAIudable  
en adolescentes**



Hola,

A continuación encontrarás una serie de cuestiones referentes a tu estilo de vida. El cuestionario es anónimo, y por lo tanto **puedes responder con toda sinceridad.**

Se trata de responder **lo que haces de verdad**, NO lo que crees que es correcto, o que “queda bien”.

Lee bien las preguntas antes de responder. Verás que hay preguntas en las que tendrás que poner un número, y otras en las que sólo tienes que marcar con una **X** la opción que elijas; por favor, no dejes ninguna pregunta en blanco. Si en alguna pregunta no encuentras la opción de respuesta que tú pondrías, marca la que **más se acerca.**

¡Muchas gracias por tu colaboración!

---



Escribe aquí tu **mes** y **año** de nacimiento

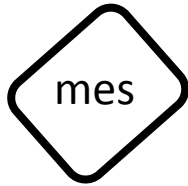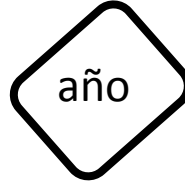

Eres **un chico**   
**una chica**

¿En qué **país** naciste?

¿En qué **país** nacieron tus padres?

**madre**

**padre**

¿Cuánto **mides?**

 cm

¿Cuánto **pesas?**

 kg



**Las siguientes  
preguntas (desde la 1  
hasta la 5),  
las has de responder  
poniendo  
un número**

1

# Ordena de 1 a 6 los siguientes grupos de alimentos

**1** es el que comes con **más** frecuencia y

**6** el que comes con **menos** frecuencia  
[no puede haber números repetidos]

Pon aquí  
el número  
de orden

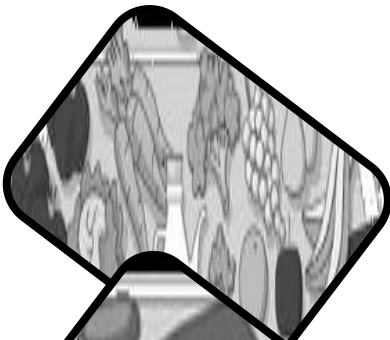

frutas, verdura, ...

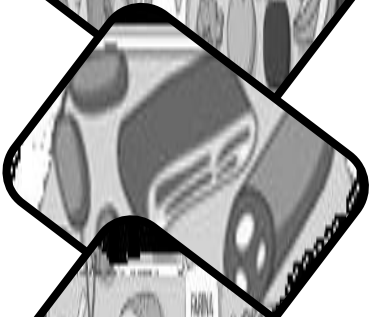

carnes rojas (cerdo,  
ternera), embutidos, ...

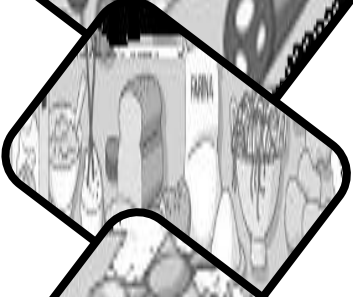

pan, pasta, cereales,  
arroz, patatas, ...

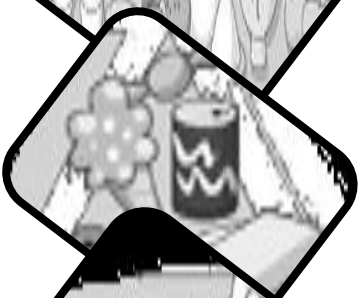

dulces, mantequilla, ...

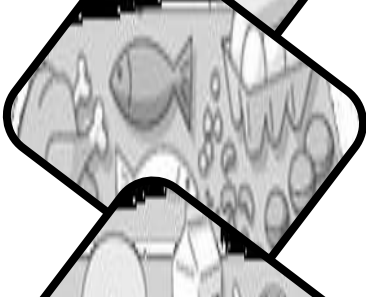

pollo, pescado, huevos, ...

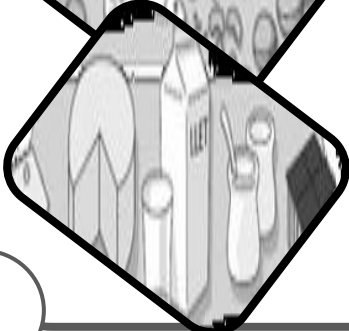

lácteos: yogurts,  
leche, queso, ...



2

# De las siguientes **bebidas alcohólicas**

indica la cantidad que consumes

[la cantidad es el número  
resultante de sumar todas las  
copas, jarras, vasos, *cubatas*,  
que hayas tomado en el  
período indicado]

Pon aquí el número.  
Si no bebes nada,  
pon un 0

desde  
el lunes  
hasta el jueves

desde  
el viernes  
hasta el domingo

cerveza  
vino,  
cava, ...

*cubatas*,  
ginebra,  
ron,  
whisky, ...

¿Cuánta actividad física **moderada** has hecho cada día de la semana pasada?

es la actividad que te permite hablar, pero con cierta dificultad, cuando la realizas

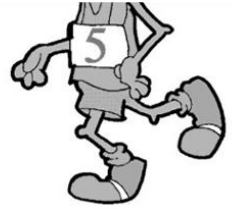

*por ejemplo:*

Andar deprisa o correr “al trote”, pasear en bicicleta o en monopatín, jugar a voleibol, ...

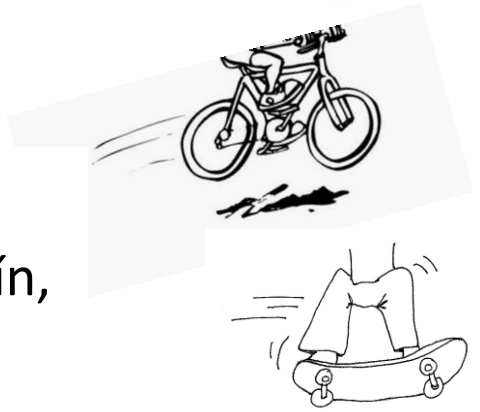

[cuéntalo en medias horas: **0'5, 1, 1'5, 2, ...**]

[pon el número en el círculo correspondiente a cada día]

lu

ma

mi

ju

vi

sa

do

total

4

¿Cuánta actividad física **intensa** has hecho cada día de la semana pasada?

es la actividad que, mientras la realizas, te costaría hablar seguido

*por ejemplo:*

Correr deprisa, jugar al fútbol o al básquet, saltar a la comba, ...

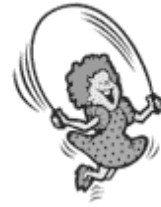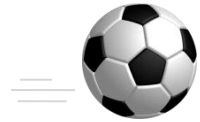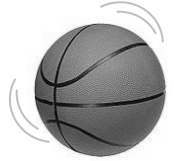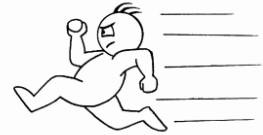

[cuéntalo en medias horas: **0'5, 1, 1'5, 2, ...**]

[pon el número en el círculo correspondiente a cada día]

lu

ma

mi

ju

vi

sa

do

total

5

# ¿Cuántas horas cada día

Estás conectado a Internet (ordenador o móvil) para **chatear** o **relacionarte** con otras personas (redes sociales, msn, etc...)?

Estás jugando con el **ordenador, móvil, consola, juegos online**, o conectado a Internet para **entretenerte?** (**no** para chatear ni relacionarte a través de redes sociales)

[cuéntalo en medias horas: **0'5, 1, 1'5, 2, ...**]

[pon el número en el círculo correspondiente a cada día]

en un día  
**no  
festivo**

en un día  
**festivo**

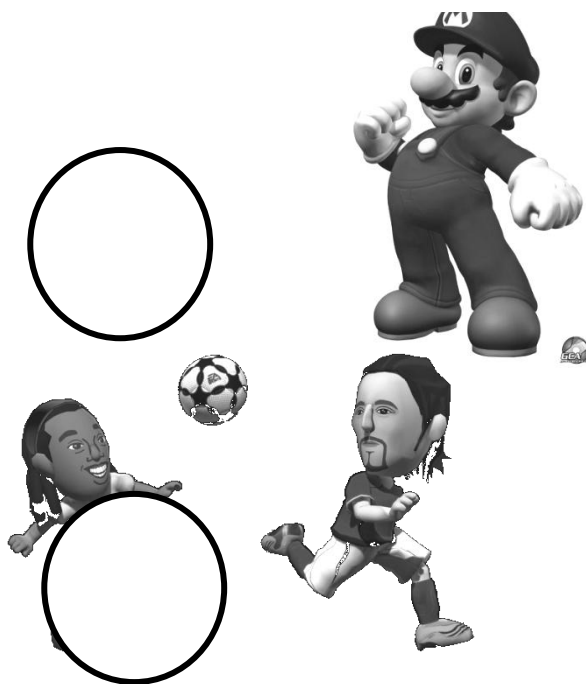

**Las siguientes  
preguntas (desde la 6  
hasta el final),  
las has de responder  
marcando con  
**una cruz**  
la opción que  
selecciones**

6

¿Cuántos

# vasos de líquido\*?

## bebes diariamente ?

[contando desde que te levantas hasta que vas a dormir]

Indícalo  
con una cruz  
donde  
corresponda

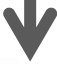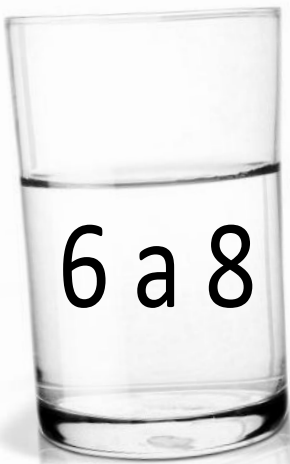

6 a 8

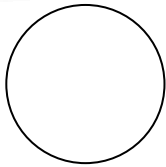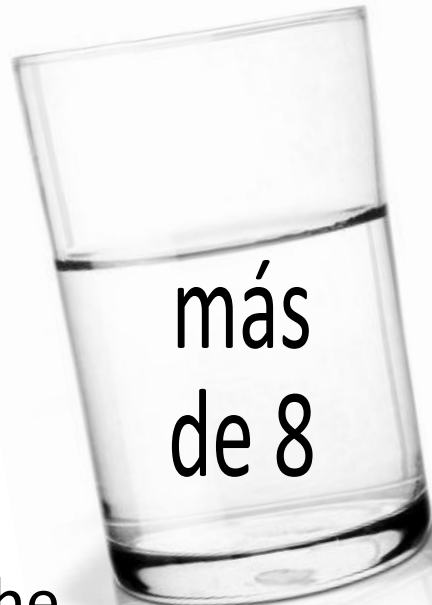

más  
de 8

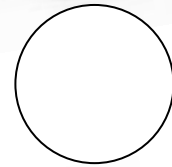

\*Agua, leche,  
zumos, etc.

**NO** cuentas  
los refrescos  
con gas

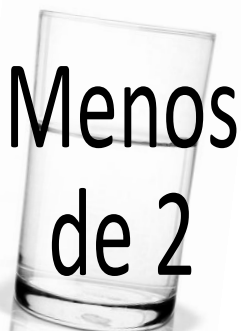

Menos  
de 2

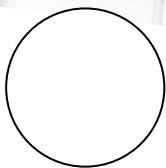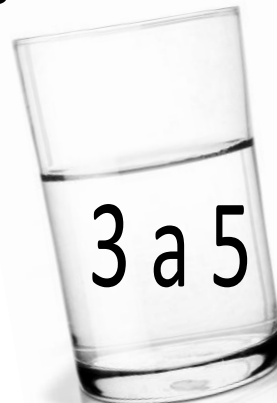

3 a 5

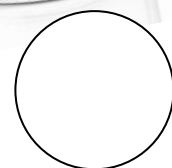

7

Cuántas

# latas de refresco con gas\*

bebes en toda una  
semana ?

[durante el curso escolar]

Indícalo  
con una cruz  
donde  
corresponda

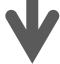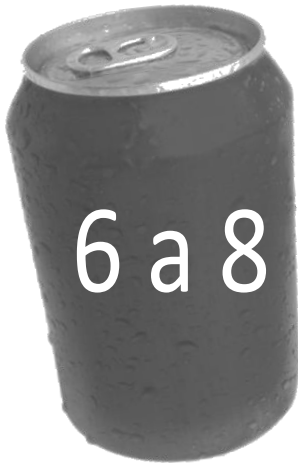

6 a 8

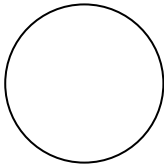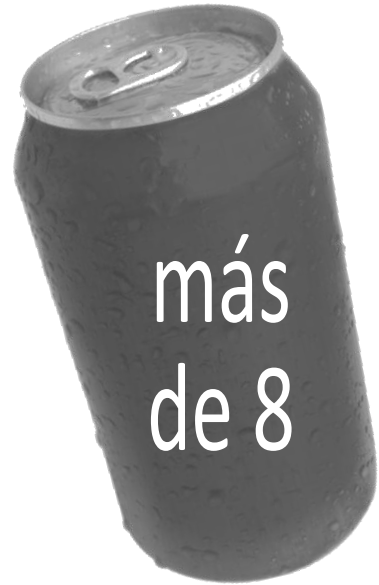

más  
de 8

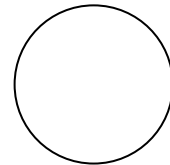

\*Cola,  
naranja,  
bebidas  
energéticas  
con gas, ...

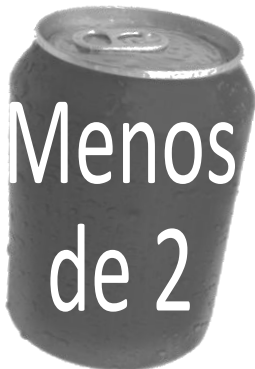

Menos  
de 2

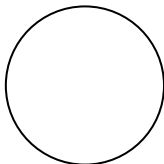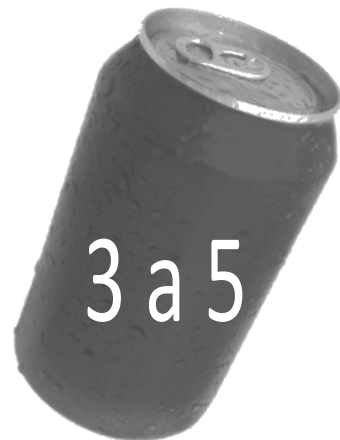

3 a 5

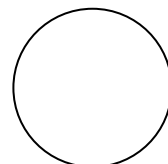

8

¿Cuántos

# cigarrillos ?

fumas cada día

Indícalo  
con una cruz  
donde corresponda

de  
lunes a jueves

de  
viernes a domingo

ninguno

entre  
1 y 10

entre  
11 y 20

entre  
21 y 30

más de  
30



9

Consumo

# de otras drogas

piensa en los últimos **12 meses**, y responde cuántas veces has consumido...

Indícalo con una cruz donde corresponda

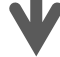

porros

otros tipos de drogas

más de una vez cada mes

menos de una vez cada mes

nunca

10

Pensando en el último mes, cuántas

horas **has dormido**

cada noche,

si al día siguiente tenías clase?

[horas que realmente duermes,  
no horas que pasas en la cama]

más  
de 9

8-9

7-8

6-7

5-6

menos  
de 5

Indícalo  
con una cruz  
donde corresponda

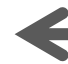

zzz

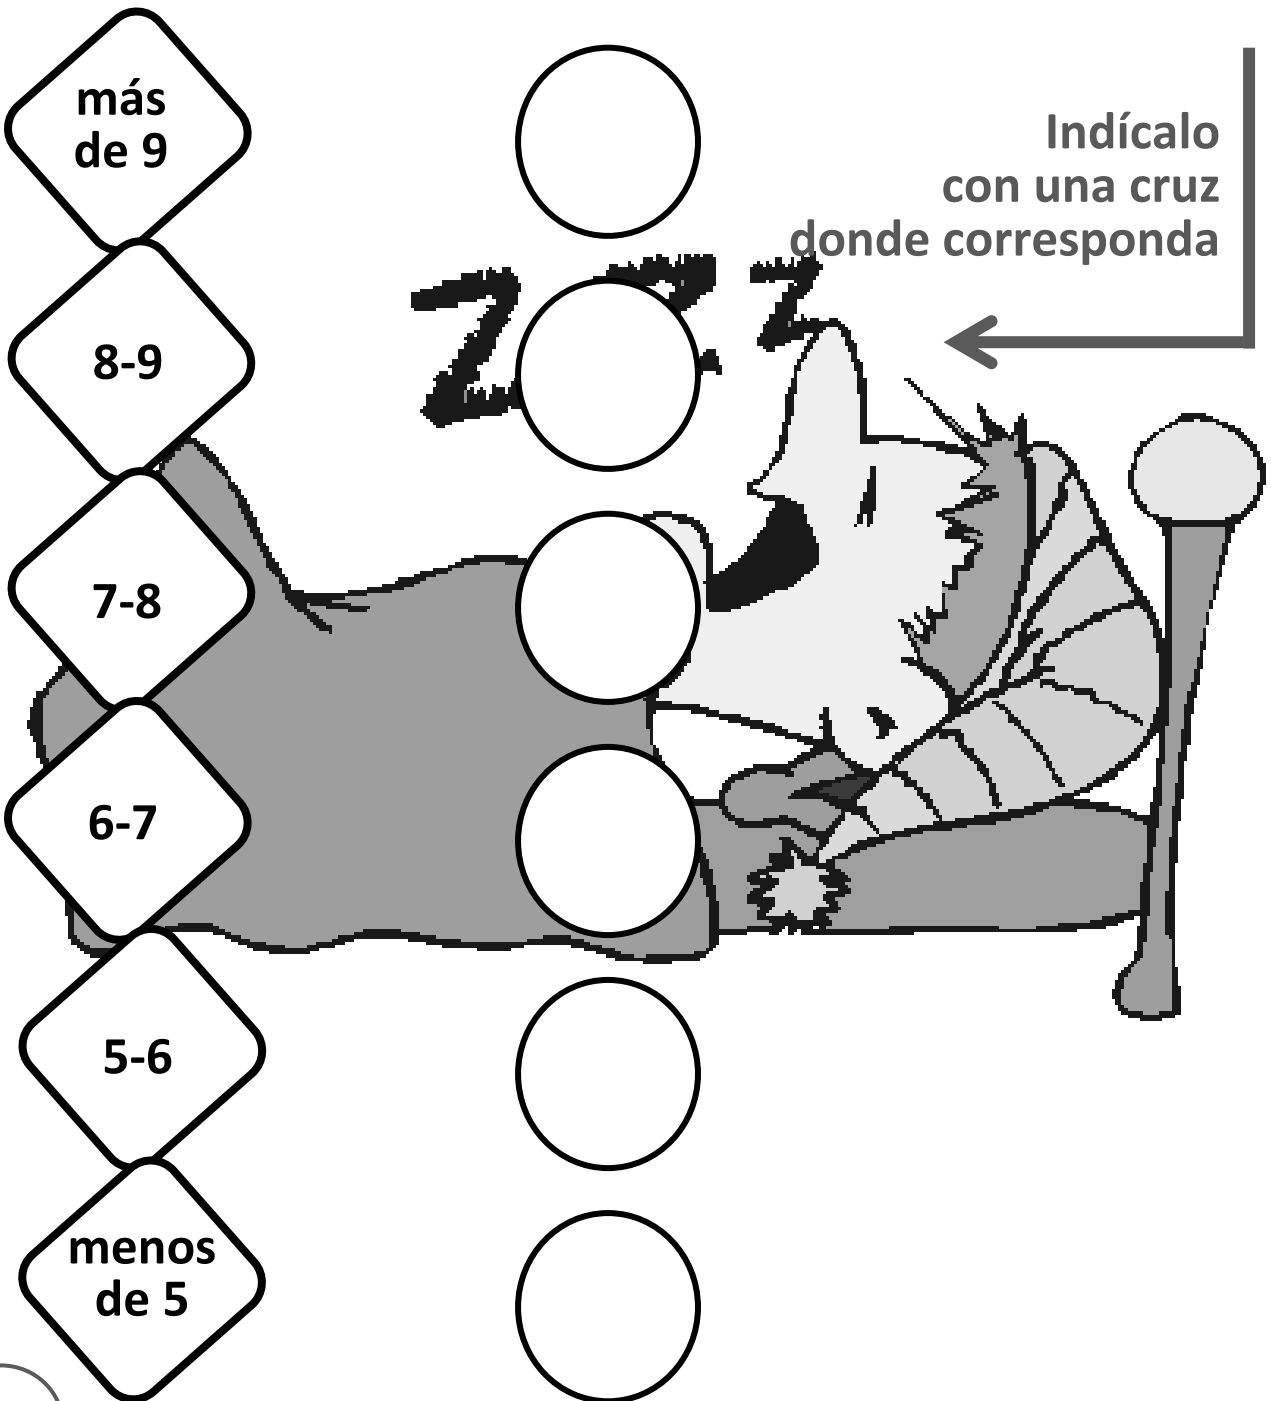

Pensando en un día cualquiera, responde

Indícalo  
con una cruz  
donde corresponda

**Cuántas veces  
te lavas  
los dientes**

nunca

no me los  
lavo cada  
día

1 vez  
al día

2 veces  
al día

3 veces  
al día

más de 3  
veces al  
día

**Cuántas veces  
te lavas  
las manos  
con agua y  
jabón**






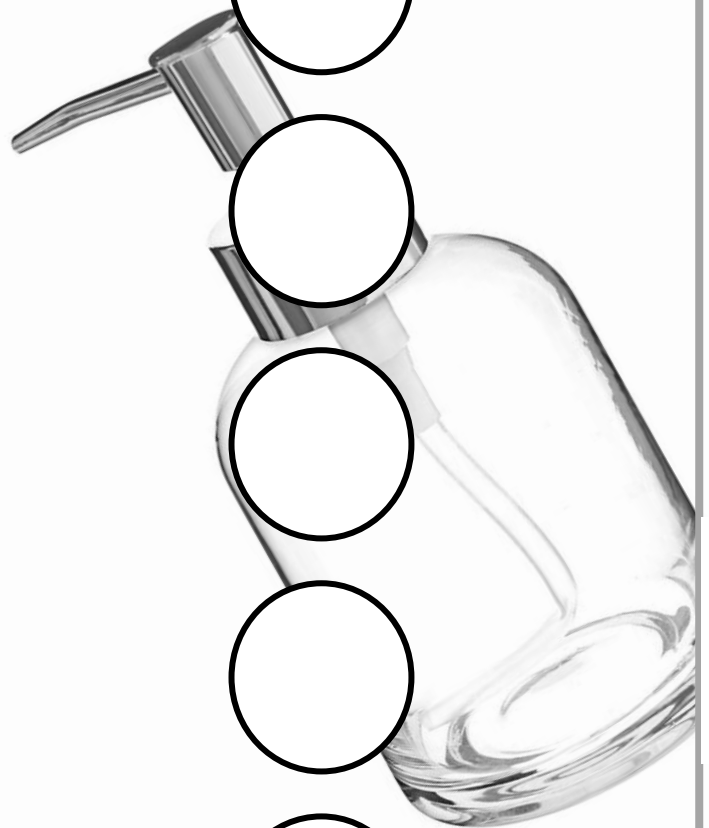

**En general, ¿cómo dirías que es tu salud?**

**Excelente**

(1)

**Muy buena**

(2)

**Buena**

(3)

**Regular**

(4)

**Mala**

(5)

**Durante los últimos 12 meses, ¿cuántas veces saliste de vacaciones con tu familia?**

**Nunca**

(1)

**Una vez**

(2)

**Dos veces**

(3)

**Más de dos veces**

(4)

**¿Cuántos ordenadores tiene tu familia?**

**Ninguno**

(1)

**Uno**

(2)

**Dos**

(3)

**Más de dos**

(4)

**¿Tiene tu familia coche propio o furgoneta?**

**No**

(1)

**Sí, uno**

(2)

**Sí, más de uno**

(3)

**¿Tienes dormitorio para ti solo?**

**Sí**

(1)

**No**

(2)
